# Supplementary material for: Nanopore strand-specific mismatch enables de novo detection of bacterial DNA modifications
Source: HighWire-hosted journal article supplement (doi:10.1101/gr.279012.124), 2024-10-02
Supplement: Supplementary_Tables.xlsx [file Supplementary_Tables.xlsx]

## Sheet: Table S1
Table S1. The statistical results of datasets generated from ONT and SRS platforms for each bacterium.
Bacterium	Group	Reads number	Base number (bp)	Average length (bp)	N50 (bp)	Q20(%)	Q30(%)	GC (%)	Read coverage (fold)
Acinetobacter pittii	Duplex WGS	5680	44916669	7907.9	15466	98.96	97.43	38.92	10.7364
Bacillus cereus	Duplex WGS	12869	49841899	3873	6128	98.85	97.24	35.45	8.95876
Enterococcus faecium	Duplex WGS	13372	94852205	7093.3	12926	99.02	97.45	37.78	31.23
Escherichia coli	Duplex WGS	4947	22601615	4568.8	10059	98.77	97.26	50.16	4.14954
Klebsiella pneumoniae	Duplex WGS	9273	110638126	11931.2	19677	98.84	97.37	56.46	18.9323
Pseudomonas aeruginosa	Duplex WGS	5288	45719465	8645.9	17591	98.99	97.62	66.27	7.13181
Salmonella enterica	Duplex WGS	4266	32369312	7587.7	14642	98.91	97.52	52.15	6.24
Staphylococcus aureus	Duplex WGS	8985	41466421	4615.1	10203	98.82	97.31	32.88	14.4292
Acinetobacter pittii	R10.4.1 WGS	1037261	2183427345	2105	12548	77.74	48.17	38.86	521.901
Bacillus cereus	R10.4.1 WGS	309267	792445267	2562.3	5594	75.18	47.21	36.07	142.437
Enterococcus faecium	R10.4.1 WGS	298774	1363861613	4564.9	11278	78.52	48.95	37.88	449.05
Escherichia coli	R10.4.1 WGS	1643527	1928106709	1173.2	6636	72.27	55.5	49.72	353.991
Klebsiella pneumoniae	R10.4.1 WGS	612126	2777541299	4537.5	17968	72.9	56.18	56.06	475.291
Pseudomonas aeruginosa	R10.4.1 WGS	999832	2293537408	2293.9	14548	78.79	56.08	65.88	357.77
Salmonella enterica	R10.4.1 WGS	1696486	2565231336	1512.1	10223	75.1	57.87	51.65	494.513
Staphylococcus aureus	R10.4.1 WGS	597564	1151581765	1927.1	7313	76.91	55.47	33.17	400.72
Acinetobacter pittii	R9.4.1 WGS	398833	1296082684	3249.7	14208	62.01	20.75	38.95	309.801
Bacillus cereus	R9.4.1 WGS	312158	951781084	3049	11298	63.47	23.06	35.38	171.077
Enterococcus faecium	R9.4.1 WGS	234837	957445894	4077.1	14584	62.21	21.01	37.73	315.238
Escherichia coli	R9.4.1 WGS	349287	810659345	2320.9	9033	60.77	32.77	50.15	148.833
Klebsiella pneumoniae	R9.4.1 WGS	184475	1500993151	8136.6	20284	58.38	31.83	56.5	256.849
Pseudomonas aeruginosa	R9.4.1 WGS	289757	1084600017	3743.1	16456	60.78	31.97	66.14	169.188
Salmonella enterica	R9.4.1 WGS	131710	941811368	7150.6	14860	60.8	33.44	52.16	181.558
Staphylococcus aureus	R9.4.1 WGS	147568	572638467	3880.5	10561	65.37	35.26	33.58	199.263
Acinetobacter pittii	SRS_R1 WGS	4408125	661218750	150	150	98.68	95.26	38.58	158.05
Acinetobacter pittii	SRS_R2 WGS	4408125	661218750	150	150	97.47	92.42	38.46	158.05
Bacillus cereus	SRS_R1 WGS	4190763	628614450	150	150	98.2	93.75	35.07	112.989
Bacillus cereus	SRS_R2 WGS	4190763	628614450	150	150	97.49	92.43	34.96	112.989
Enterococcus faecium	SRS_R1 WGS	4355305	653295750	150	150	98.55	94.88	37.34	215.097
Enterococcus faecium	SRS_R2 WGS	4355305	653295750	150	150	97.07	91.48	37.22	215.097
Escherichia coli	SRS_R1 WGS	3996687	599503050	150	150	98.53	94.7	49.7	110.066
Escherichia coli	SRS_R2 WGS	3996687	599503050	150	150	96.88	90.73	49.61	110.066
Klebsiella pneumoniae	SRS_R1 WGS	4117317	617597550	150	150	97.13	90.34	55.67	105.683
Klebsiella pneumoniae	SRS_R2 WGS	4117317	617597550	150	150	96.72	90.06	55.52	105.683
Pseudomonas aeruginosa	SRS_R1 WGS	3345414	501812100	150	150	97.98	92.85	65.83	78.278
Pseudomonas aeruginosa	SRS_R2 WGS	3345414	501812100	150	150	95.66	87.06	65.69	78.278
Salmonella enterica	SRS_R1 WGS	3873722	581058300	150	150	98.28	93.97	32.69	112.014
Salmonella enterica	SRS_R2 WGS	3873722	581058300	150	150	97.84	93.51	32.63	112.014
Staphylococcus aureus	SRS_R1 WGS	3852260	577839000	150	150	98.54	94.63	51.57	201.072
Staphylococcus aureus	SRS_R2 WGS	3852260	577839000	150	150	96.64	89.86	51.45	201.072
Acinetobacter pittii	R10.4.1 WGA	1283223	1010312395	787.3	945	77.64	60.08	38.82	241.493
Enterococcus faecium	R10.4.1 WGA	1815777	1072896550	590.9	576	76.33	59.62	37.1	353.25
Escherichia coli	R10.4.1 WGA	1446314	1100901959	761.2	839	72.4	54.18	49.54	202.12
Klebsiella pneumoniae	R10.4.1 WGA	1372896	1064840415	775.6	875	72.42	54.66	54.48	182.215
Acinetobacter pittii	R9.4.1 WGA	1022218	412215044	403.3	412	66.23	22.49	38.92	98.5312
Bacillus cereus	R9.4.1 WGA	589573	244380401	414.5	416	65.74	23.72	35.92	43.9258
Enterococcus faecium	R9.4.1 WGA	6386588	2476100734	387.7	401	66.16	23.03	37	815.253
Escherichia coli	R9.4.1 WGA	761760	324417813	425.9	417	63.67	18.12	49.25	59.5615
Klebsiella pneumoniae	R9.4.1 WGA	764202	324743087	424.9	418	63.3	18.46	53.03	55.5698
Pseudomonas aeruginosa	R9.4.1 WGA	556778	225803098	405.6	403	63.58	30.41	61.29	35.2232
Salmonella enterica	R9.4.1 WGA	364489	171401044	470.3	441	63.67	17.91	51.24	33.0419
Staphylococcus aureus	R9.4.1 WGA	422398	174504176	413.1	419	67.92	27.1	34.22	60.7228

## Sheet: Table S2
Table S2. The statistical results of assembly genomes.
Bacterium	Group	Length (bp)
Acinetobacter pittii	chromosome	3896718
Acinetobacter pittii	plasmid	275647
Acinetobacter pittii	plasmid	11236
Bacillus cereus	chromosome	5379811
Bacillus cereus	plasmid	183668
Enterococcus faecium	chromosome	2785439
Enterococcus faecium	plasmid	158463
Enterococcus faecium	plasmid	10737
Enterococcus faecium	plasmid	37267
Enterococcus faecium	plasmid	45311
Escherichia coli	chromosome	4868913
Escherichia coli	plasmid	97575
Escherichia coli	plasmid	106238
Escherichia coli	plasmid	48412
Escherichia coli	plasmid	84198
Escherichia coli	plasmid	72824
Escherichia coli	plasmid	168612
Klebsiella pneumoniae	chromosome	5406825
Klebsiella pneumoniae	plasmid	260017
Klebsiella pneumoniae	plasmid	19351
Klebsiella pneumoniae	plasmid	157680
Pseudomonas aeruginosa	chromosome	6410639
Salmonella enterica	chromosome	5019577
Salmonella enterica	plasmid	167813
Staphylococcus aureus	chromosome	2847214
Staphylococcus aureus	plasmid	26571

## Sheet: Table S3
Table S3. The genome information of eight bacteria.
Bacterium	chromsome size (bp)	plasmid number	BUSCO score	BUSCO database
Acinetobacter pittii	4183601	2	C:99.8%[S:99.5%,D:0.3%],F:0.1%,M:0.1%,n:782	pseudomonadales_odb10
Bacillus cereus	5563479	1	C:99.6%[S:94.7%,D:4.9%],F:0.2%,M:0.2%,n:450	bacillales_odb10
Enterococcus faecium	3037217	4	C:99.5%[S:98.5%,D:1.0%],F:0.2%,M:0.3%,n:402	lactobacillales_odb10
Escherichia coli	5446772	6	C:100.0%[S:99.3%,D:0.7%],F:0.0%,M:0.0%,n:440	enterobacterales_odb10
Klebsiella pneumoniae	5843873	3	C:98.7%[S:98.2%,D:0.5%],F:0.2%,M:1.1%,n:440	enterobacterales_odb10
Pseudomonas aeruginosa	6410639	0	C:99.8%[S:99.2%,D:0.6%],F:0.1%,M:0.1%,n:782	pseudomonadales_odb10
Salmonella enterica	5187390	1	C:99.3%[S:99.1%,D:0.2%],F:0.0%,M:0.7%,n:440	enterobacterales_odb10
Staphylococcus aureus	2873785	1	C:99.8%[S:99.8%,D:0.0%],F:0.2%,M:0.0%,n:450	bacillales_odb10

## Sheet: Table S4
Table S4. The position of error-prone C sites and G sites.
Chromsome	start	end	base		Chromsome	start	end	base		Chromsome	start	end	base		Chromsome	start	end	base
A. pittii_chrom	1003638	1003639	C		E. faecium_chrom	1021574	1021575	C		E. coli_chrom	1156701	1156702	C		K. pneumoniae_chrom	149975	149976	C
A. pittii_chrom	103711	103712	C		E. faecium_chrom	1116595	1116596	C		E. coli_chrom	1235231	1235232	C		K. pneumoniae_chrom	2058577	2058578	C
A. pittii_chrom	1042412	1042413	C		E. faecium_chrom	1146559	1146560	C		E. coli_chrom	1367525	1367526	C		K. pneumoniae_chrom	2287422	2287423	C
A. pittii_chrom	1077381	1077382	C		E. faecium_chrom	1194689	1194690	C		E. coli_chrom	1377826	1377827	C		K. pneumoniae_chrom	2644483	2644484	C
A. pittii_chrom	1103307	1103308	C		E. faecium_chrom	124635	124636	C		E. coli_chrom	1383625	1383626	C		K. pneumoniae_chrom	2908521	2908522	C
A. pittii_chrom	1129403	1129404	C		E. faecium_chrom	124821	124822	C		E. coli_chrom	1386757	1386758	C		K. pneumoniae_chrom	2918356	2918357	C
A. pittii_chrom	1153421	1153422	C		E. faecium_chrom	1266345	1266346	C		E. coli_chrom	1400099	1400100	C		K. pneumoniae_chrom	3140382	3140383	C
A. pittii_chrom	118822	118823	C		E. faecium_chrom	1276849	1276850	C		E. coli_chrom	157953	157954	C		K. pneumoniae_chrom	3445664	3445665	C
A. pittii_chrom	1278761	1278762	C		E. faecium_chrom	1302736	1302737	C		E. coli_chrom	1735839	1735840	C		K. pneumoniae_chrom	3739065	3739066	C
A. pittii_chrom	1318623	1318624	C		E. faecium_chrom	1324184	1324185	C		E. coli_chrom	1942273	1942274	C		K. pneumoniae_chrom	3754070	3754071	C
A. pittii_chrom	1318826	1318827	C		E. faecium_chrom	1346008	1346009	C		E. coli_chrom	2290347	2290348	C		K. pneumoniae_chrom	375841	375842	C
A. pittii_chrom	1319661	1319662	C		E. faecium_chrom	1399909	1399910	C		E. coli_chrom	2378313	2378314	C		K. pneumoniae_chrom	3831203	3831204	C
A. pittii_chrom	1324669	1324670	C		E. faecium_chrom	1590000	1590001	C		E. coli_chrom	242539	242540	C		K. pneumoniae_chrom	3956874	3956875	C
A. pittii_chrom	1327587	1327588	C		E. faecium_chrom	1669419	1669420	C		E. coli_chrom	2702492	2702493	C		K. pneumoniae_chrom	3977859	3977860	C
A. pittii_chrom	1379797	1379798	C		E. faecium_chrom	1746194	1746195	C		E. coli_chrom	3038404	3038405	C		K. pneumoniae_chrom	4063286	4063287	C
A. pittii_chrom	1437047	1437048	C		E. faecium_chrom	1761431	1761432	C		E. coli_chrom	3040237	3040238	C		K. pneumoniae_chrom	4187007	4187008	C
A. pittii_chrom	1608674	1608675	C		E. faecium_chrom	1888466	1888467	C		E. coli_chrom	3398431	3398432	C		K. pneumoniae_chrom	4270790	4270791	C
A. pittii_chrom	1618547	1618548	C		E. faecium_chrom	1908467	1908468	C		E. coli_chrom	3439410	3439411	C		K. pneumoniae_chrom	43333	43334	C
A. pittii_chrom	1649648	1649649	C		E. faecium_chrom	1931413	1931414	C		E. coli_chrom	3598106	3598107	C		K. pneumoniae_chrom	4522479	4522480	C
A. pittii_chrom	1755594	1755595	C		E. faecium_chrom	2012412	2012413	C		E. coli_chrom	3690473	3690474	C		K. pneumoniae_chrom	4523049	4523050	C
A. pittii_chrom	1820598	1820599	C		E. faecium_chrom	2031975	2031976	C		E. coli_chrom	4065353	4065354	C		K. pneumoniae_chrom	4527074	4527075	C
A. pittii_chrom	1829198	1829199	C		E. faecium_chrom	2149428	2149429	C		E. coli_chrom	4230332	4230333	C		K. pneumoniae_chrom	4532766	4532767	C
A. pittii_chrom	185801	185802	C		E. faecium_chrom	2170458	2170459	C		E. coli_chrom	4237319	4237320	C		K. pneumoniae_chrom	4608636	4608637	C
A. pittii_chrom	1904560	1904561	C		E. faecium_chrom	220784	220785	C		E. coli_chrom	4239252	4239253	C		K. pneumoniae_chrom	4609767	4609768	C
A. pittii_chrom	190851	190852	C		E. faecium_chrom	2215010	2215011	C		E. coli_chrom	4240173	4240174	C		K. pneumoniae_chrom	4610553	4610554	C
A. pittii_chrom	1939467	1939468	C		E. faecium_chrom	224623	224624	C		E. coli_chrom	4240872	4240873	C		K. pneumoniae_chrom	4632139	4632140	C
A. pittii_chrom	2062707	2062708	C		E. faecium_chrom	2275629	2275630	C		E. coli_chrom	4267039	4267040	C		K. pneumoniae_chrom	4632317	4632318	C
A. pittii_chrom	2076843	2076844	C		E. faecium_chrom	2433345	2433346	C		E. coli_chrom	4285710	4285711	C		K. pneumoniae_chrom	4650195	4650196	C
A. pittii_chrom	210610	210611	C		E. faecium_chrom	2541126	2541127	C		E. coli_chrom	4394732	4394733	C		K. pneumoniae_chrom	5107406	5107407	C
A. pittii_chrom	2113277	2113278	C		E. faecium_chrom	2545949	2545950	C		E. coli_chrom	4482004	4482005	C		K. pneumoniae_chrom	522134	522135	C
A. pittii_chrom	2137926	2137927	C		E. faecium_chrom	2603307	2603308	C		E. coli_chrom	4544935	4544936	C		K. pneumoniae_chrom	5221910	5221911	C
A. pittii_chrom	2182406	2182407	C		E. faecium_chrom	2706977	2706978	C		E. coli_chrom	4585113	4585114	C		K. pneumoniae_chrom	5260015	5260016	C
A. pittii_chrom	2249394	2249395	C		E. faecium_chrom	2729721	2729722	C		E. coli_chrom	4743308	4743309	C		K. pneumoniae_chrom	5276056	5276057	C
A. pittii_chrom	2290449	2290450	C		E. faecium_chrom	2732738	2732739	C		E. coli_chrom	4763785	4763786	C		K. pneumoniae_chrom	5287701	5287702	C
A. pittii_chrom	230480	230481	C		E. faecium_chrom	291901	291902	C		E. coli_chrom	714126	714127	C		K. pneumoniae_chrom	554687	554688	C
A. pittii_chrom	2351027	2351028	C		E. faecium_chrom	342944	342945	C		E. coli_chrom	719306	719307	C		K. pneumoniae_chrom	761815	761816	C
A. pittii_chrom	2407798	2407799	C		E. faecium_chrom	349719	349720	C		E. coli_chrom	1151493	1151494	G		K. pneumoniae_chrom	764198	764199	C
A. pittii_chrom	2423112	2423113	C		E. faecium_chrom	416363	416364	C		E. coli_chrom	1151594	1151595	G		K. pneumoniae_chrom	956071	956072	C
A. pittii_chrom	2514241	2514242	C		E. faecium_chrom	42887	42888	C		E. coli_chrom	1266294	1266295	G		K. pneumoniae_chrom	964769	964770	C
A. pittii_chrom	2529578	2529579	C		E. faecium_chrom	489321	489322	C		E. coli_chrom	1321755	1321756	G		K. pneumoniae_chrom	979192	979193	C
A. pittii_chrom	2633453	2633454	C		E. faecium_chrom	490847	490848	C		E. coli_chrom	1327443	1327444	G		K. pneumoniae_chrom	1602152	1602153	G
A. pittii_chrom	2698537	2698538	C		E. faecium_chrom	514508	514509	C		E. coli_chrom	1334941	1334942	G		K. pneumoniae_chrom	1614012	1614013	G
A. pittii_chrom	273138	273139	C		E. faecium_chrom	519662	519663	C		E. coli_chrom	1367522	1367523	G		K. pneumoniae_chrom	2101805	2101806	G
A. pittii_chrom	2784797	2784798	C		E. faecium_chrom	584014	584015	C		E. coli_chrom	1391097	1391098	G		K. pneumoniae_chrom	3406179	3406180	G
A. pittii_chrom	2787500	2787501	C		E. faecium_chrom	58589	58590	C		E. coli_chrom	1393388	1393389	G		K. pneumoniae_chrom	3460662	3460663	G
A. pittii_chrom	2799476	2799477	C		E. faecium_chrom	607928	607929	C		E. coli_chrom	1697253	1697254	G		K. pneumoniae_chrom	3469809	3469810	G
A. pittii_chrom	2804095	2804096	C		E. faecium_chrom	627577	627578	C		E. coli_chrom	1830971	1830972	G		K. pneumoniae_chrom	3470193	3470194	G
A. pittii_chrom	2813886	2813887	C		E. faecium_chrom	676559	676560	C		E. coli_chrom	2181488	2181489	G		K. pneumoniae_chrom	3492123	3492124	G
A. pittii_chrom	2831407	2831408	C		E. faecium_chrom	774890	774891	C		E. coli_chrom	2633213	2633214	G		K. pneumoniae_chrom	3492444	3492445	G
A. pittii_chrom	2900413	2900414	C		E. faecium_chrom	78111	78112	C		E. coli_chrom	2661428	2661429	G		K. pneumoniae_chrom	3855356	3855357	G
A. pittii_chrom	2916507	2916508	C		E. faecium_chrom	809789	809790	C		E. coli_chrom	2732709	2732710	G		K. pneumoniae_chrom	3946296	3946297	G
A. pittii_chrom	2938526	2938527	C		E. faecium_chrom	841721	841722	C		E. coli_chrom	3047592	3047593	G		K. pneumoniae_chrom	4194211	4194212	G
A. pittii_chrom	2998591	2998592	C		E. faecium_chrom	85252	85253	C		E. coli_chrom	3055053	3055054	G		K. pneumoniae_chrom	4415507	4415508	G
A. pittii_chrom	3036071	3036072	C		E. faecium_chrom	908982	908983	C		E. coli_chrom	3160016	3160017	G		K. pneumoniae_chrom	4533246	4533247	G
A. pittii_chrom	3209058	3209059	C		E. faecium_chrom	915465	915466	C		E. coli_chrom	3244302	3244303	G		K. pneumoniae_chrom	4608633	4608634	G
A. pittii_chrom	3313931	3313932	C		E. faecium_chrom	1033167	1033168	G		E. coli_chrom	3591006	3591007	G		K. pneumoniae_chrom	462127	462128	G
A. pittii_chrom	3316688	3316689	C		E. faecium_chrom	1046497	1046498	G		E. coli_chrom	3591683	3591684	G		K. pneumoniae_chrom	4724022	4724023	G
A. pittii_chrom	3325123	3325124	C		E. faecium_chrom	1076877	1076878	G		E. coli_chrom	3756746	3756747	G		K. pneumoniae_chrom	4810798	4810799	G
A. pittii_chrom	3362707	3362708	C		E. faecium_chrom	1108330	1108331	G		E. coli_chrom	4081478	4081479	G		K. pneumoniae_chrom	4828420	4828421	G
A. pittii_chrom	3386653	3386654	C		E. faecium_chrom	1166000	1166001	G		E. coli_chrom	4157776	4157777	G		K. pneumoniae_chrom	957053	957054	G
A. pittii_chrom	3439079	3439080	C		E. faecium_chrom	1196772	1196773	G		E. coli_chrom	4239654	4239655	G
A. pittii_chrom	3441711	3441712	C		E. faecium_chrom	1311705	1311706	G		E. coli_chrom	4340661	4340662	G
A. pittii_chrom	3453758	3453759	C		E. faecium_chrom	1323082	1323083	G		E. coli_chrom	4434328	4434329	G
A. pittii_chrom	3456633	3456634	C		E. faecium_chrom	1335580	1335581	G		E. coli_chrom	4479064	4479065	G
A. pittii_chrom	3501655	3501656	C		E. faecium_chrom	1376451	1376452	G		E. coli_chrom	4609857	4609858	G
A. pittii_chrom	3506331	3506332	C		E. faecium_chrom	1415439	1415440	G		E. coli_chrom	4631124	4631125	G
A. pittii_chrom	3539215	3539216	C		E. faecium_chrom	150784	150785	G		E. coli_chrom	47453	47454	G
A. pittii_chrom	3614118	3614119	C		E. faecium_chrom	1593171	1593172	G		E. coli_chrom	866511	866512	G
A. pittii_chrom	3629628	3629629	C		E. faecium_chrom	1665335	1665336	G		E. coli_chrom	875307	875308	G
A. pittii_chrom	3668379	3668380	C		E. faecium_chrom	1673243	1673244	G		E. coli_chrom	929463	929464	G
A. pittii_chrom	3679040	3679041	C		E. faecium_chrom	1694563	1694564	G
A. pittii_chrom	370204	370205	C		E. faecium_chrom	1757516	1757517	G
A. pittii_chrom	3736395	3736396	C		E. faecium_chrom	1777578	1777579	G
A. pittii_chrom	3796900	3796901	C		E. faecium_chrom	1781260	1781261	G
A. pittii_chrom	3877189	3877190	C		E. faecium_chrom	179582	179583	G
A. pittii_chrom	3894011	3894012	C		E. faecium_chrom	1817137	1817138	G
A. pittii_chrom	494993	494994	C		E. faecium_chrom	1926264	1926265	G
A. pittii_chrom	513160	513161	C		E. faecium_chrom	2020063	2020064	G
A. pittii_chrom	547213	547214	C		E. faecium_chrom	209629	209630	G
A. pittii_chrom	5735	5736	C		E. faecium_chrom	2164719	2164720	G
A. pittii_chrom	580259	580260	C		E. faecium_chrom	2179642	2179643	G
A. pittii_chrom	629984	629985	C		E. faecium_chrom	2319371	2319372	G
A. pittii_chrom	685565	685566	C		E. faecium_chrom	2320286	2320287	G
A. pittii_chrom	807214	807215	C		E. faecium_chrom	242177	242178	G
A. pittii_chrom	894135	894136	C		E. faecium_chrom	2424799	2424800	G
A. pittii_chrom	911299	911300	C		E. faecium_chrom	2581473	2581474	G
A. pittii_chrom	925965	925966	C		E. faecium_chrom	2581647	2581648	G
A. pittii_chrom	937844	937845	C		E. faecium_chrom	2709049	2709050	G
A. pittii_chrom	950862	950863	C		E. faecium_chrom	2725378	2725379	G
A. pittii_chrom	997280	997281	C		E. faecium_chrom	2782574	2782575	G
A. pittii_chrom	1084696	1084697	G		E. faecium_chrom	318144	318145	G
A. pittii_chrom	109040	109041	G		E. faecium_chrom	40132	40133	G
A. pittii_chrom	1095564	1095565	G		E. faecium_chrom	41213	41214	G
A. pittii_chrom	1103420	1103421	G		E. faecium_chrom	449379	449380	G
A. pittii_chrom	1140411	1140412	G		E. faecium_chrom	449622	449623	G
A. pittii_chrom	1224448	1224449	G		E. faecium_chrom	484411	484412	G
A. pittii_chrom	1229324	1229325	G		E. faecium_chrom	488544	488545	G
A. pittii_chrom	1265912	1265913	G		E. faecium_chrom	515933	515934	G
A. pittii_chrom	1304814	1304815	G		E. faecium_chrom	548413	548414	G
A. pittii_chrom	1347788	1347789	G		E. faecium_chrom	56143	56144	G
A. pittii_chrom	1351199	1351200	G		E. faecium_chrom	57860	57861	G
A. pittii_chrom	1429018	1429019	G		E. faecium_chrom	594335	594336	G
A. pittii_chrom	1487902	1487903	G		E. faecium_chrom	642332	642333	G
A. pittii_chrom	1525354	1525355	G		E. faecium_chrom	646739	646740	G
A. pittii_chrom	162271	162272	G		E. faecium_chrom	724833	724834	G
A. pittii_chrom	1644165	1644166	G		E. faecium_chrom	734087	734088	G
A. pittii_chrom	1648118	1648119	G		E. faecium_chrom	740112	740113	G
A. pittii_chrom	167715	167716	G		E. faecium_chrom	94241	94242	G
A. pittii_chrom	1677249	1677250	G		E. faecium_chrom	942954	942955	G
A. pittii_chrom	1789829	1789830	G		E. faecium_chrom	977088	977089	G
A. pittii_chrom	1831736	1831737	G
A. pittii_chrom	1862609	1862610	G
A. pittii_chrom	1956018	1956019	G
A. pittii_chrom	1971557	1971558	G
A. pittii_chrom	2071488	2071489	G
A. pittii_chrom	2073522	2073523	G
A. pittii_chrom	2094324	2094325	G
A. pittii_chrom	2111550	2111551	G
A. pittii_chrom	2169503	2169504	G
A. pittii_chrom	2187857	2187858	G
A. pittii_chrom	2194955	2194956	G
A. pittii_chrom	2240828	2240829	G
A. pittii_chrom	2267745	2267746	G
A. pittii_chrom	234490	234491	G
A. pittii_chrom	2424512	2424513	G
A. pittii_chrom	2437348	2437349	G
A. pittii_chrom	2522491	2522492	G
A. pittii_chrom	2600812	2600813	G
A. pittii_chrom	265960	265961	G
A. pittii_chrom	2701114	2701115	G
A. pittii_chrom	2784170	2784171	G
A. pittii_chrom	2807316	2807317	G
A. pittii_chrom	2852895	2852896	G
A. pittii_chrom	2870936	2870937	G
A. pittii_chrom	289400	289401	G
A. pittii_chrom	2978954	2978955	G
A. pittii_chrom	2986493	2986494	G
A. pittii_chrom	2996343	2996344	G
A. pittii_chrom	3067409	3067410	G
A. pittii_chrom	3107643	3107644	G
A. pittii_chrom	3126768	3126769	G
A. pittii_chrom	3139972	3139973	G
A. pittii_chrom	315485	315486	G
A. pittii_chrom	3204417	3204418	G
A. pittii_chrom	3225579	3225580	G
A. pittii_chrom	3353722	3353723	G
A. pittii_chrom	3365881	3365882	G
A. pittii_chrom	3453114	3453115	G
A. pittii_chrom	356547	356548	G
A. pittii_chrom	357931	357932	G
A. pittii_chrom	3783760	3783761	G
A. pittii_chrom	3785214	3785215	G
A. pittii_chrom	3799498	3799499	G
A. pittii_chrom	381292	381293	G
A. pittii_chrom	394586	394587	G
A. pittii_chrom	403283	403284	G
A. pittii_chrom	422403	422404	G
A. pittii_chrom	441963	441964	G
A. pittii_chrom	571316	571317	G
A. pittii_chrom	670599	670600	G
A. pittii_chrom	697051	697052	G
A. pittii_chrom	867541	867542	G
A. pittii_chrom	882676	882677	G
A. pittii_chrom	985297	985298	G

## Sheet: Table S5
Table S5. Motif-related methyltransferase detected in bacterial species.
species	motif	type	sequences (see supplementary material)	link
E. coli	GATC	Orphan methyltransferase	>NC_000913.3:c3515913-3515077	https://www.ncbi.nlm.nih.gov/gene/?term=947893
	CCWGG	Orphan methyltransferase	>NC_000913.3:c2032317-2030899	https://www.ncbi.nlm.nih.gov/gene/?term=946479
E. faecium	CYAANNNNNNGRTY	Type I methyltransferase	>M.Efa008ORFAP_CYAANNNNNNGRTY_1536nt	http://rebase.neb.com/rebase/enz/M.Efa008ORFAP.html
S. aureus	GATC	Type II methyltransferase	>M.Sau24117RORFDP_GATC_1239nt	http://rebase.neb.com/rebase/enz/M.Sau24117RORFDP.html
	GGANNNNNNNTGC	Type I methyltransferase	>M.Sau13137II_GGANNNNNNNTGC_1557nt	http://rebase.neb.com/rebase/enz/M.Sau13137II.html
			>M.Sau108233ORF9320P_GGANNNNNNNTGC_1740nt	http://rebase.neb.com/rebase/enz/M.Sau108233ORF9320P.html
	GWAGNNNNNNTAAA	Type I methyltransferase	>M.Sau1073ORF7975P_GWAGNNNNNNTAAA_1557nt	http://rebase.neb.com/rebase/enz/M.Sau1073ORF7975P.html
K. pneumoniae	GATC	Orphan methyltransferase	>M.KpnHs39DamP_GATC_828nt	http://rebase.neb.com/rebase/enz/M.KpnHs39DamP.html
	GTGANNNNNNNTGG	Type I methyltransferase	>M.KpnCRKP10ORFIP_GTGANNNNNNNTGG_1524nt	http://rebase.neb.com/rebase/enz/M.KpnCRKP10ORFIP.html
S. enterica	GATC	Orphan methyltransferase	>M.Sen00093DamP_GATC_837nt	http://rebase.neb.com/rebase/enz/M.Sen00093DamP.html
	CTCTG (RC: CAGAG)	Type III methyltransferase	>M.Sen0011ORFEP_CAGAG_1959nt	http://rebase.neb.com/rebase/enz/M.Sen0011ORFEP.html

## Sheet: Table S6
Table S6. The details of the dam and dcm gene from NCBI.
Species	Gene_ID	Gene_Name	Gene_length	Gene_description	Position	Protein_length	Methylation motif	Link
Escherichia coli str. K-12 substr. MG1655	947893	dam	837	DNA adenine methyltransferase	NC_000913.3 (3515077..3515913, complement)	278	GATC	https://www.ncbi.nlm.nih.gov/gene/?term=947893%5Buid%5D
Escherichia coli str. K-12 substr. MG1655	946479	dcm	1419	DNA-cytosine methyltransferase	NC_000913.3 (2030899..2032317, complement)	472	CCWGG	https://www.ncbi.nlm.nih.gov/gene/?term=946479

## Sheet: Table S7
Table S7. The results of the BLASTn using the dam and dcm sequences from MG1655 strain mapping against our E. coli reference.
qseqid	sseqid	pident	length	mismatch	gapopen	qstart	qend	sstart	send	evalue	bitscore
NC_000913.3:3515077-3515913（dam）	chrom	99.403	837	5	0	1	837	3805834	3806670	0	1519
NC_000913.3:2030899-2032317 (dcm)	chrom	98.168	1419	26	0	1	1419	1411735	1410317	0	2477
qseqid: query or source (gene) sequence id; sseqid: subject or target (reference genome) sequence id; pident: percentage of identical positions; length: alignment length (sequence overlap); mismatch: number of mismatches; gapopen: number of gap openings; qstart: start of alignment in query; qend: end of alignment in query; sstart: start of alignment in subject; send: end of alignment in subject; …

## Sheet: Table S8
Table S8. The details of the dam and dcm gene found within the E. coli genome.
Gene_Name	Gene_length	Protein_length	Position
dam	836	278	chrom (3805834...3806670)
dcm	1418	472	chrom (1410317...1411735)
